# Supplementary material for: A dual S-scheme TiO2@In2Se3@Ag3PO4 heterojunction for efficient photocatalytic CO2 reduction
Source: Royal Society of Chemistry journal article supplement (doi:10.1039/d2nr04707a), 2022-01-01
Supplement: d2nr04707a1.pdf [file d2nr04707a1.pdf]

## Supporting Information

### Dual S-scheme $\text{TiO}_2@\text{In}_2\text{Se}_3@\text{Ag}_3\text{PO}_4$ heterojunction for efficient photocatalytic $\text{CO}_2$ reduction

Hange Feng,<sup>a</sup> Chaomin Zhang,<sup>b</sup> Menghao Luo,<sup>c</sup> Yuechuan Hu,<sup>c</sup> Zibo Dong,<sup>c</sup> Shaolin Xue,<sup>c\*</sup>  
and Paul K. Chu<sup>d</sup>

<sup>a</sup> College of Information Science and Technology, Donghua University, Shanghai 201620, P. R. China

<sup>b</sup> School of Mathematics, Physics and Statistics, Shanghai University of Engineering Science, Shanghai 201620, China

<sup>c</sup> College of Science, Donghua University, Shanghai 201620, P. R. China

<sup>d</sup> Department of Physics, Department of Materials Science and Engineering, and Department of Biomedical Engineering, City University of Hong Kong, Tat Chee Avenue, Kowloon, Hong Kong, China

E-mail addresses: 17721486315@163.com (H. Feng); zhangchaomin@sues.edu.cn (C. Zhang); 2202248@mail.dhu.edu.cn (M. Luo); hyc270322@163.com (Y. Hu); dzbdhu@163.com (Z. Dong); slxue@dhu.edu.cn (S. Xue); paul.chu@cityu.edu.hk (Paul K. Chu)

\* Corresponding author: Fax: +86 21 67792089; E-mail address: slxue@dhu.edu.cn (S.L. Xue)

### Synthesis of hollow TiO<sub>2</sub>@Ag<sub>3</sub>PO<sub>4</sub>

The as prepared TiO<sub>2</sub> was then dispersed in 30 mL of absolute ethanol, and 0.1 g of HPC and 0.5 mL of deionized water were added to it and stirred for 30 min. The ethanolic suspension of Ag<sub>3</sub>PO<sub>4</sub> was added to the above solution and the mixed solution was transferred to an autoclave with a Teflon liner and kept at 100°C for 8 h to obtain TiO<sub>2</sub>@Ag<sub>3</sub>PO<sub>4</sub>.

### Photocatalytic CO<sub>2</sub> reduction test

A 200 mL self-made Pyrex reactor with a silicone rubber septum was used to evaluate the photocatalytic CO<sub>2</sub> reduction efficiency of the samples. 10 mL of deionized water and 25 mg of photocatalyst were added to the Pyrex reactor and sonicated for 10 min. The reactor was placed in a vacuum oven so that the photocatalyst was deposited uniformly onto the bottom of the reactor. In the photocatalytic reaction, the air in the Pyrex reactor was flushed with N<sub>2</sub> and then CO<sub>2</sub> and H<sub>2</sub>O were generated *in situ* by the reaction of 84 mg of aqueous NaHCO<sub>3</sub> and H<sub>2</sub>SO<sub>4</sub> (0.3 mL, 2 M, introduced by syringe). The reactor was irradiated with a 300 W Xe lamp with a 400 nm filter and a 780 nm reflector, in which the outputting light density was approximately 150 mW/cm<sup>2</sup> by calibrating with an NREL-calibrated Si solar cell. The gases generated were detected at intervals by gas chromatography (GC-2014C, Shimadzu, Japan). After the 1 h of reaction, 1 mL of the gas was collected by a syringe and analyzed by gas chromatograph (GC-2014, Shimadzu, Japan). <sup>13</sup>C-isotope tracer experiment was carried out to investigate the carbon source. NaH<sup>13</sup>CO<sub>3</sub> was replaced by NaHCO<sub>3</sub> for the *in situ* generation of <sup>13</sup>CO<sub>2</sub> and H<sub>2</sub>O and the generated products were analysed by gas chromatography-mass spectrometry (6980N network GC system-5975 inert mass selective detector, Agilent Technologies, USA).

**The calculation of the apparent quantum efficiency (AQE):** The AQE was performed under a 300 W Xe lamp with certain monochromatic light filter. In this paper, the AQE is defined as the ratio of the photocatalytic electron consumption ( $N_{electron}$ ) to the induced photons flux per hour ( $N_{photon}$ ) within a specialized wavelength range, which can be illustrate as the followed formula:

$$AQE(\%) = \frac{N_{electron}}{N_{photon}}$$

The  $N_{photon}$  is calculated using the following equation:

$$N_{photon} = \frac{Light\ intensity \times Illumination\ area \times Time}{N_A \times Average\ single\ photon\ energy\ (E_{photon})}$$

Where the illumination area is controlled to 1 cm<sup>2</sup>,  $N_A$  is the Avogadro constant. The  $E_{photon}$  at a certain wavelength is calculated using the following equation:

$$E_{photon} = \frac{hc}{\lambda}$$

Where  $h$  is the Plank constant,  $c$  indicates speed of light, and  $\lambda$  is the wavelength.

**The calculation of the bandgaps ( $E_g$ ):** The bandgaps ( $E_g$ ) of the sample is calculated by the following equation:

$$(\alpha h\nu)^{1/n} = A(h\nu - E_g)$$

Where  $\alpha$  is the absorbance index,  $h\nu$  is the photon energy,  $n$  is the nature of the electronic transition (equal to 1/2 in this case) and  $A$  is a constant.

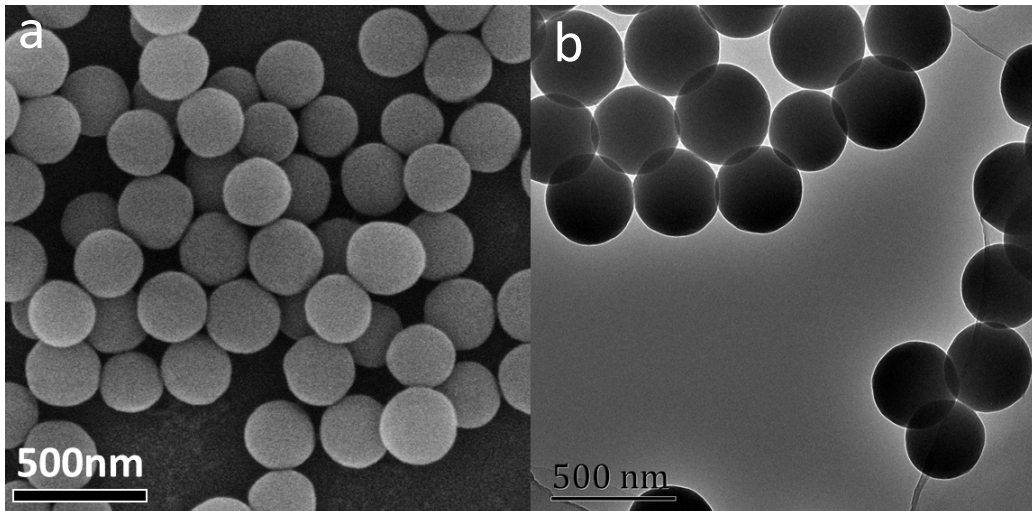

Fig. S1. (a) SEM image and (b) TEM image of SiO<sub>2</sub>.

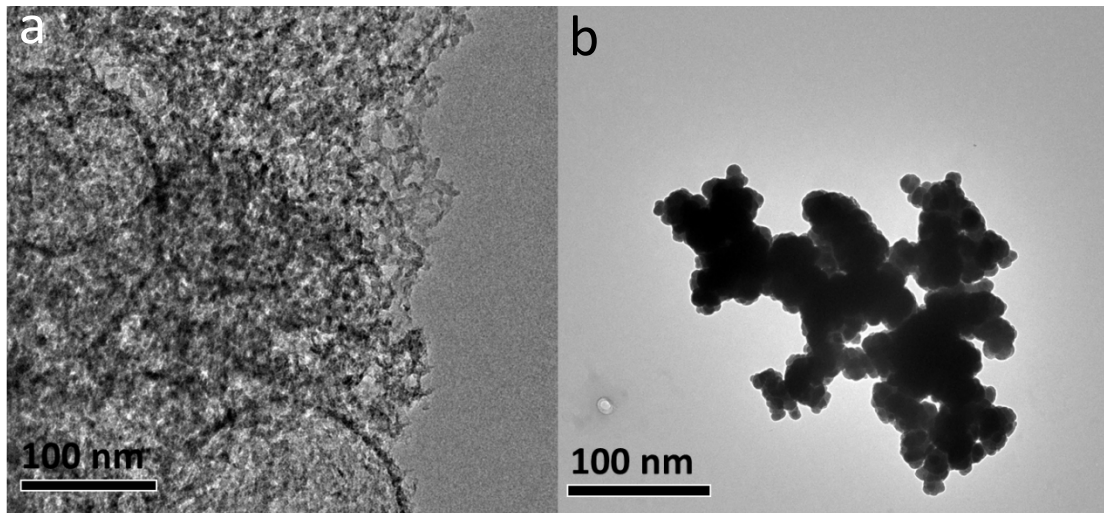

Fig. S2. TEM images of (a) In<sub>2</sub>Se<sub>3</sub> and (b) Ag<sub>3</sub>PO<sub>4</sub>.

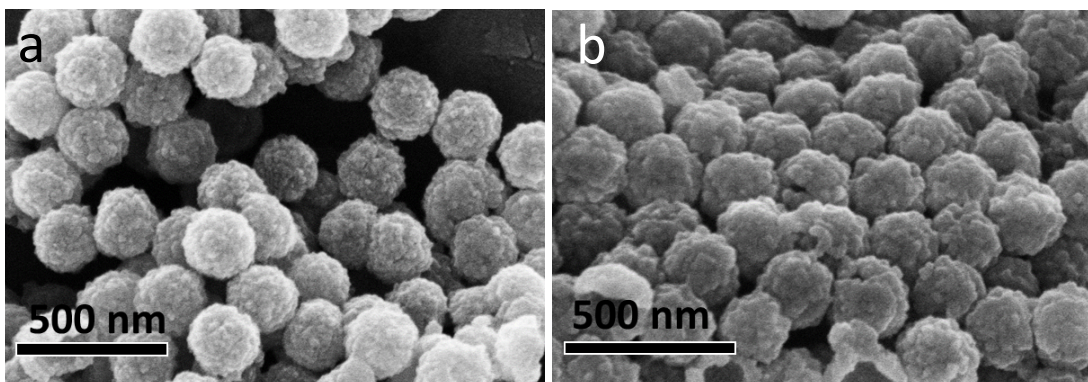

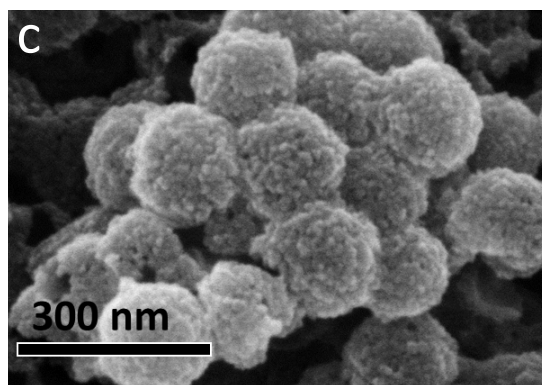

Fig. S3. SEM images of (a) hollow  $\text{TiO}_2$ , (b)  $\text{TiO}_2@In_2Se_3$  and (c)  $\text{TiO}_2@In_2Se_3@Ag_3PO_4$ .

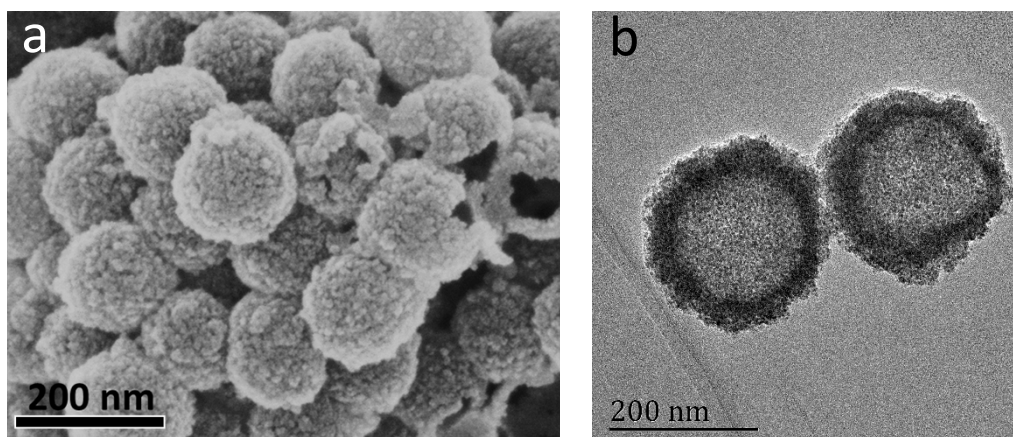

Fig. S4. (a) SEM and (b) TEM images of  $\text{TiO}_2@Ag_3PO_4$ .

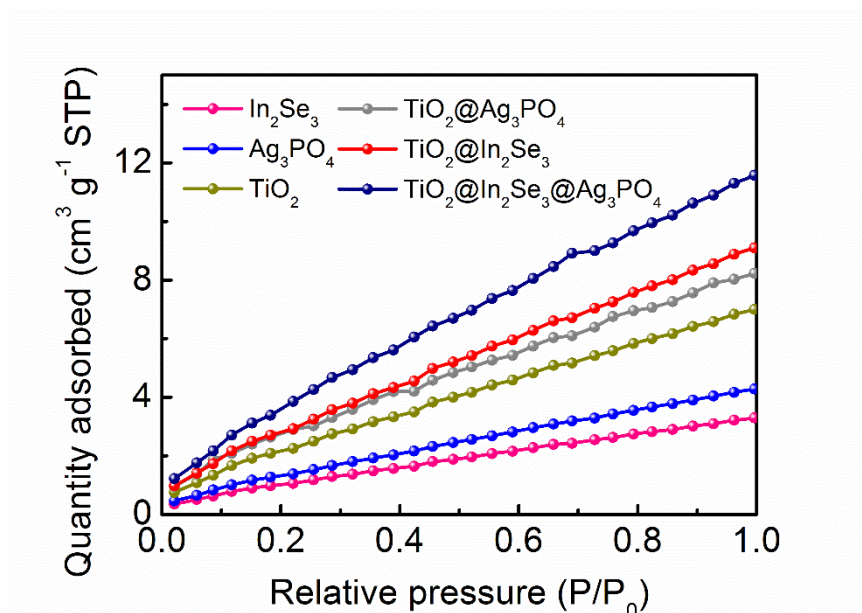

Fig. S5. CO<sub>2</sub> adsorption isotherms of  $\text{TiO}_2$ ,  $\text{In}_2\text{Se}_3$ ,  $\text{Ag}_3\text{PO}_4$ ,  $\text{TiO}_2@Ag_3PO_4$ ,  $\text{TiO}_2@In_2Se_3$  and  $\text{TiO}_2@In_2Se_3@Ag_3PO_4$ .

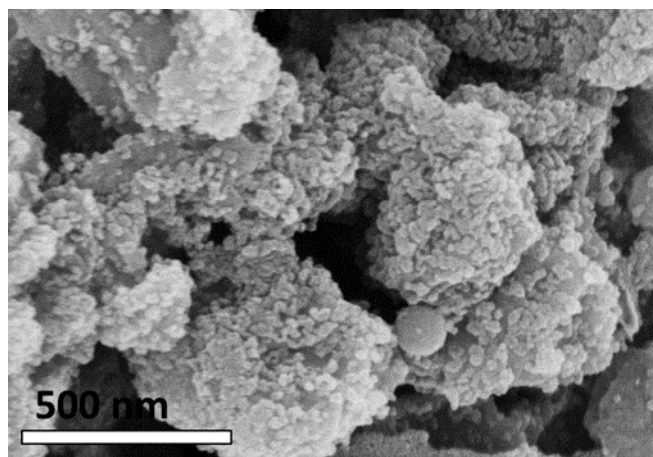

Fig. S6. SEM image of bulk-TiO<sub>2</sub>.

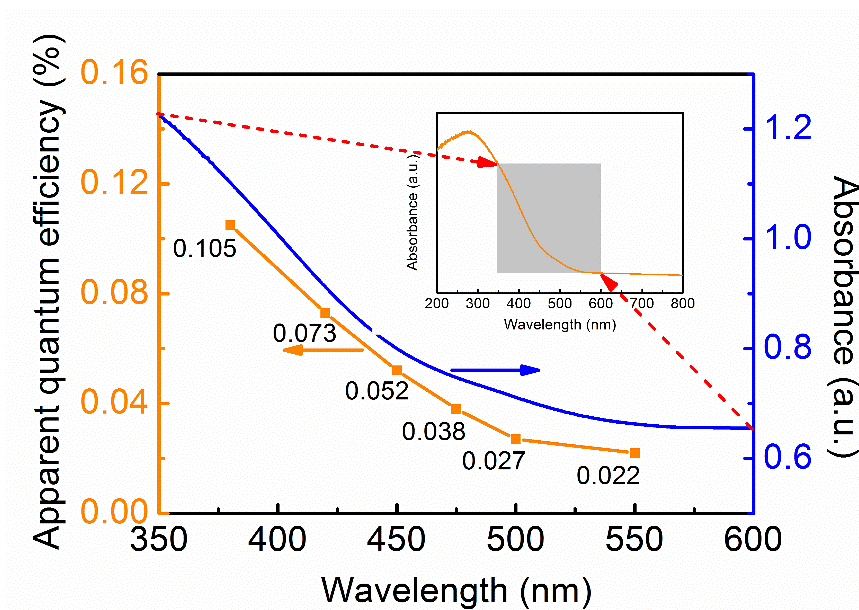

Fig. S7. Apparent quantum efficiency (AQE) and UV-vis spectra of TiO<sub>2</sub>@In<sub>2</sub>Se<sub>3</sub>@Ag<sub>3</sub>PO<sub>4</sub>.

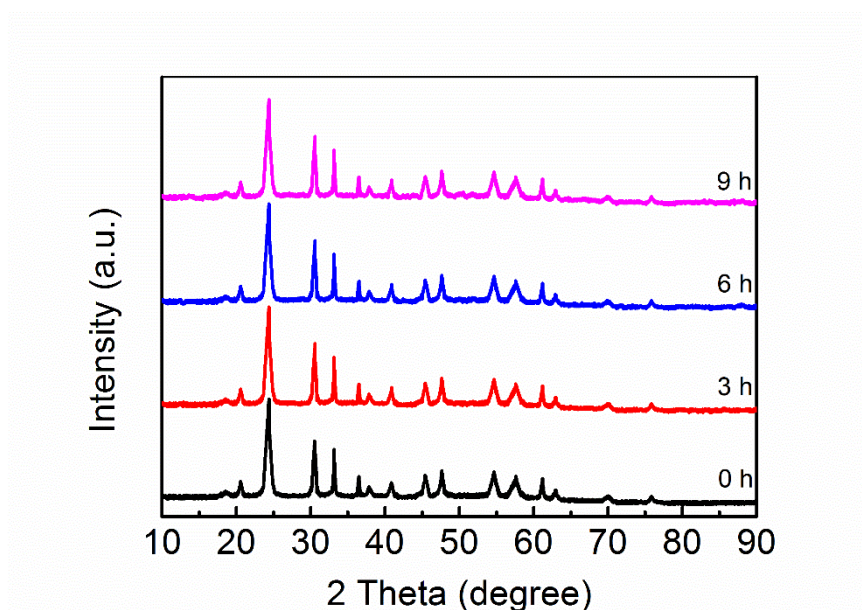

Fig. S8. XRD spectra of  $\text{TiO}_2@ \text{In}_2\text{Se}_3@ \text{Ag}_3\text{PO}_4$  after testing for 6 h.

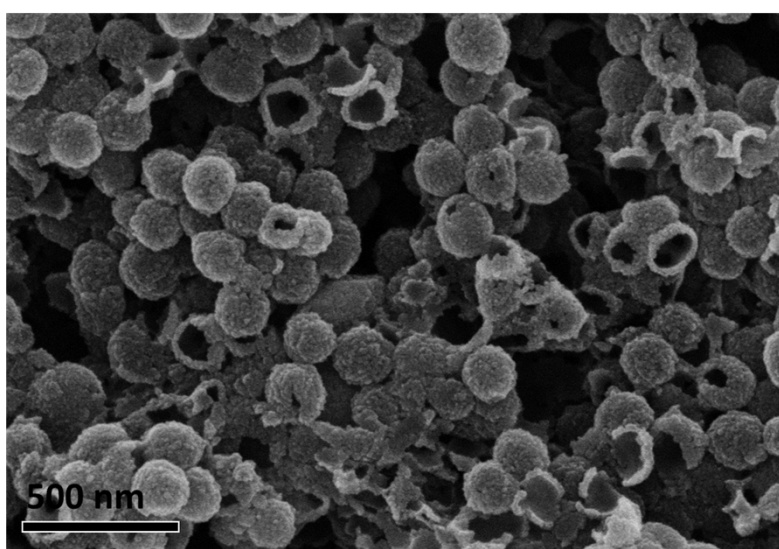

Fig. S9. SEM image of  $\text{TiO}_2@ \text{In}_2\text{Se}_3@ \text{Ag}_3\text{PO}_4$  after testing for 6 h.

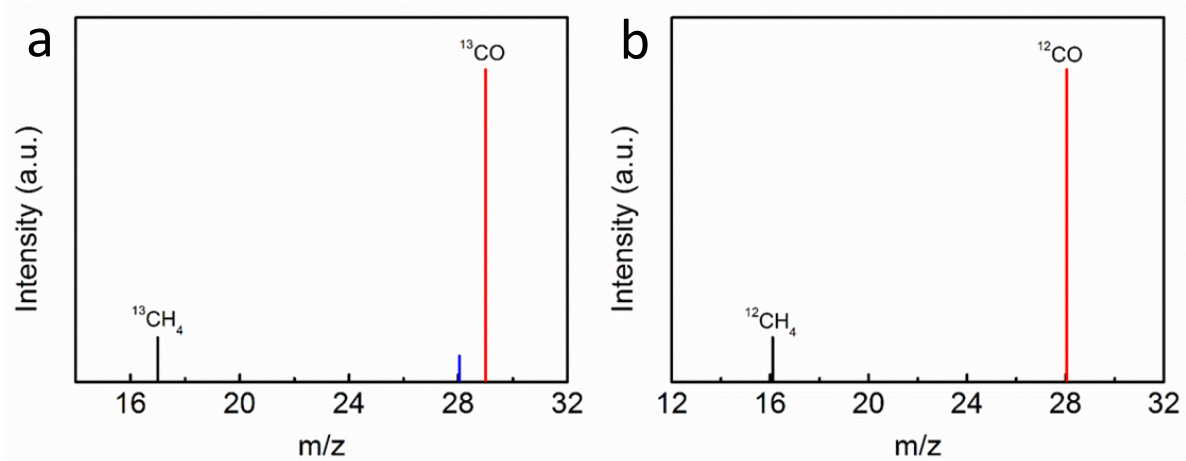

Fig. S10. GC-MS spectra of the isotope labeled catalytic products: (a)  $^{13}\text{CO}_2$  and  $\text{H}_2\text{O}$  (vapor,  $m/z = 18$ ) atmosphere and (b)  $\text{CO}_2$  ( $m/z = 44$ ) and  $\text{H}_2\text{O}$  atmosphere.

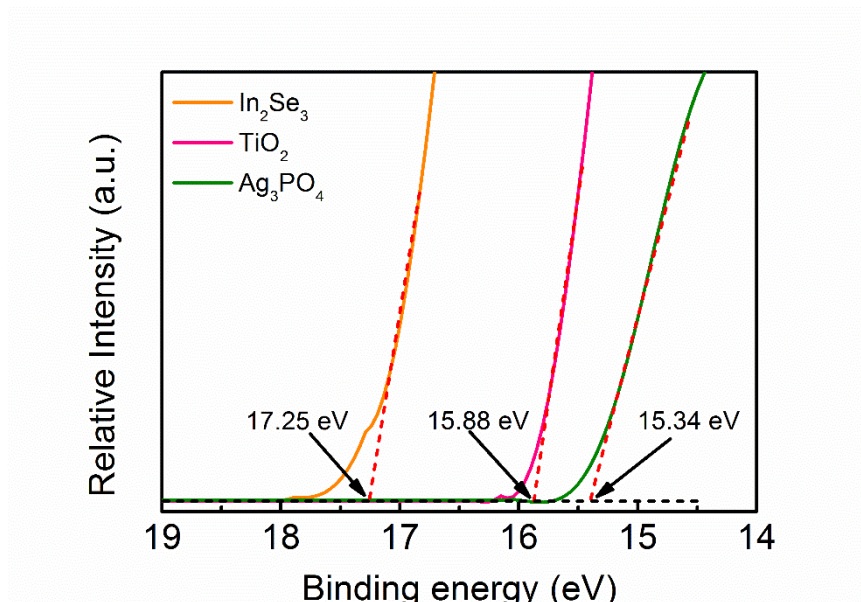

Fig. S11. UPS plots of  $\text{TiO}_2$ ,  $\text{In}_2\text{Se}_3$  and  $\text{Ag}_3\text{PO}_4$ .



Table S1. Comparison of the measured evolution rates of O<sub>2</sub> with its theoretical ones in terms of the amount of photoreduction products.

|                                                                       | Photoreduction product rate (μmol h <sup>-1</sup> g <sup>-1</sup> ) |                    |       | Photooxidation product rate (μmol h <sup>-1</sup> g <sup>-1</sup> ) |                           |
|-----------------------------------------------------------------------|---------------------------------------------------------------------|--------------------|-------|---------------------------------------------------------------------|---------------------------|
|                                                                       | CH <sub>4</sub>                                                     | CH <sub>3</sub> OH | CO    | O <sub>2</sub> (Theoretical)                                        | O <sub>2</sub> (Measured) |
| bulk-TiO <sub>2</sub>                                                 | 0.21                                                                | 0.51               | 1.69  | 2.03                                                                | 1.92                      |
| TiO <sub>2</sub>                                                      | 0.38                                                                | 0.87               | 2.59  | 3.36                                                                | 2.97                      |
| In <sub>2</sub> Se <sub>3</sub>                                       | 1.03                                                                | 1.97               | 3.32  | 6.68                                                                | 6.04                      |
| Ag <sub>3</sub> PO <sub>4</sub>                                       | 0.01                                                                | 0.02               | 0.015 | 0.05                                                                | 0.01                      |
| TiO <sub>2</sub> @Ag <sub>3</sub> PO <sub>4</sub>                     | 2.58                                                                | 3.87               | 5.03  | 13.48                                                               | 12.85                     |
| TiO <sub>2</sub> @In <sub>2</sub> Se <sub>3</sub>                     | 2.72                                                                | 4.03               | 5.52  | 14.25                                                               | 13.27                     |
| TiO <sub>2</sub> @In <sub>2</sub> Se <sub>3</sub> @Ag <sub>3</sub> PO | 3.98                                                                | 4.32               | 7.14  | 18.01                                                               | 16.92                     |
| 4                                                                     |                                                                     |                    |       |                                                                     |                           |

Theoretical amount of O<sub>2</sub> = (amount of CH<sub>4</sub>×8 + amount of CH<sub>3</sub>OH×6 + amount of CO×2)/4.

Table S2. The fitted parameters obtained from decay curves of samples in TRPL spectra.

| Sample                                                                | A <sub>1</sub> (%) | τ <sub>1</sub> | A <sub>2</sub> (%) | τ <sub>2</sub> | τ <sub>a</sub> |
|-----------------------------------------------------------------------|--------------------|----------------|--------------------|----------------|----------------|
| TiO <sub>2</sub>                                                      | 57.64              | 1.47           | 42.63              | 5.02           | 4.01           |
| In <sub>2</sub> Se <sub>3</sub>                                       | 63.21              | 1.38           | 36.79              | 4.79           | 3.66           |
| Ag <sub>3</sub> PO <sub>4</sub>                                       | 48.73              | 1.69           | 51.27              | 6.23           | 5.30           |
| TiO <sub>2</sub> @Ag <sub>3</sub> PO <sub>4</sub>                     | 40.21              | 1.13           | 59.79              | 3.87           | 3.42           |
| TiO <sub>2</sub> @In <sub>2</sub> Se <sub>3</sub>                     | 36.47              | 1.03           | 63.53              | 3.29           | 2.94           |
| TiO <sub>2</sub> @In <sub>2</sub> Se <sub>3</sub> @Ag <sub>3</sub> PO | 23.18              | 0.83           | 76.82              | 2.57           | 2.42           |
| 4                                                                     |                    |                |                    |                |                |
